# Supplementary material for: Scratchpads: a data-publishing framework to build, share and manage information on the diversity of life
Source: PubMed Central journal article supplement (PMC2775152; doi:10.1186/1471-2105-10-s14-s6), 2009-11-10
Supplement: 1471-2105-10-S14-S6-S1.pdf [file 1471-2105-10-S14-S6-S1.pdf]

## Scratchpads Additional File - Modules

### Additional File - Modules

Contributed (C) and Scratchpad written (S) modules used within the Scratchpad project. The classification module (EOL) has been developed with the Encyclopedia of Life's "LifeDesk" project. Contributed modules can be found at [http://drupal.org/project/\[Project Short Name\]](http://drupal.org/project/[Project Short Name]). The Scratchpad modules and the EOL classification module can be found at [http://svn.scratchpads.eu/viewvc/scratchpads/branches/drupal6/sites/all/modules/\[Project Short Name\]](http://svn.scratchpads.eu/viewvc/scratchpads/branches/drupal6/sites/all/modules/[Project Short Name]). Selected Scratchpad modules have also been published on the Drupal project website when we consider them to be of use to the broader Drupal community.

| Source | Project Short Name         | Project Description                                                                                                       |
|--------|----------------------------|---------------------------------------------------------------------------------------------------------------------------|
| C      | advanced_help              | Provides an interface to the improved module documentation.                                                               |
| S      | ahah_action                | Provides a Norwegian pop band.                                                                                            |
| C      | auto_nodetitle             | Automatically gives nodes of specific content types a title.                                                              |
| S      | autotag                    | Automatically associates nodes with terms within the node.                                                                |
| S      | backup                     | Enables a site administrator to download a dump of the site's database, and all uploaded files.                           |
| S      | batax                      | Alters the taxonomy input form to an autocomplete field, rather than a drop down box.                                     |
| C      | biblio                     | Provides the biblio content type for adding of references to a Scratchpad.                                                |
| C      | boost                      | Caches Scratchpad content to reduce server load.                                                                          |
| C      | cck                        | Allows for the creation of custom content types.                                                                          |
| C      | checkbox_validate          | Required by the Legal module to enforce validation of required checkbox fields.                                           |
| S      | citation                   | Provides a block that enables users to create a permanent copy of the current page.                                       |
| EOL    | classification             | Written by EOL, this improves the management of taxonomic classifications.                                                |
| S      | classification_biblio      | Allows a taxonomy term to be associated with a biblio node.                                                               |
| S      | classification_scratchpads | Adjusts the Classification module so that it works with the Scratchpad system.                                            |
| C      | contemplate                | Allows administrators to adjust the way content types are displayed.                                                      |
| S      | countriesmap               | Provides a content type for displaying world maps with highlighted countries.                                             |
| C      | creativecommons_lite       | Enables content creators to associate CC licences with a node.                                                            |
| S      | darwincore                 | Provides the Darwincore specimen and location content types.                                                              |
| C      | date                       | Provides additional fields for the content type module allowing users to enter dates.                                     |
| S      | fixperms                   | Fixes permissions associated with content types created by the node module.                                               |
| C      | fotonotes                  | Allows a user to add notes directly to an image on a Scratchpad.                                                          |
| C      | globalredirect             | Ensures that each node is displayed at one URL, redirecting others that can access the node.                              |
| C      | gmap                       | Provides integration with Google Maps.                                                                                    |
| S      | hashcash                   | Blocks spam content based on the Hashcash algorithm                                                                       |
| C      | i18n                       | Provides the translation and internationalization interface.                                                              |
| C      | image                      | Provides the Image content type, and image galleries.                                                                     |
| S      | imagemex                   | Enables multiple images to be uploaded to a site by dragging them onto a page.                                            |
| C      | imce                       | Provides an intuitive interface for uploading files to embed within text areas.                                           |
| C      | imce_wysiwyg               | Links the IMCE module with the WYSIWYG module.                                                                            |
| S      | ispecies                   | Provides the iSpecies views used on Taxon pages.                                                                          |
| C      | jquery_ui                  | Extends the jQuery library.                                                                                               |
| C      | jquery_update              | Extends the jQuery library.                                                                                               |
| C      | jstools                    | Provides collapsible menus and Javascript tabs.                                                                           |
| S      | leftandright               | Improves handling of very large taxonomies, enabling them to handle in excess of 2 million terms.                         |
| C      | legal                      | Enforces confirmation of the terms and conditions of use document during user registration.                               |
| C      | lightbox2                  | Provides the image popups in image galleries and Taxon pages.                                                             |
| C      | location                   | Allows a node to be associated with a location.                                                                           |
| S      | lowername                  | Improves searching of taxonomy terms by autotag, taxtab, and related modules.                                             |
| S      | mado                       | Provides the block layout of Taxon pages.                                                                                 |
| S      | matrix_editor              | Provides a grid interface for creating editable views, and also hooks into the Nexus module.                              |
| C      | messaging                  | Provides the API for other modules to send emails and messages to users.                                                  |
| C      | mollom                     | Protects a site from spam by checking content using the <a href="http://www.mollom.org">http://www.mollom.org</a> service |
| S      | nagger                     | Enables a user to restrict what roles can and cannot see in a node.                                                       |
| S      | nexus                      | Provides the character data editor.                                                                                       |
| C      | node_clone                 | Allows a user to quickly clone an existing node for subsequent editing.                                                   |
| C      | node_import                | Supported node import from Tab or Comma delimited files.                                                                  |
| S      | node_term_edit             | Allows automated node association with terms by appending ?tid=[TERM ID] to the node edit page.                           |
| C      | notifications              | Notifies users when content is added to a site.                                                                           |
| C      | og                         | Provides a way of grouping content within a site that can only be accessed by group members.                              |
| C      | pathauto                   | Generates URL aliases for a node.                                                                                         |
| C      | path_redirect              | Redirects URLs from old url aliases to new ones.                                                                          |
| C      | print                      | Provides a link to print friendly versions of most pages.                                                                 |
| C      | quote                      | Enables users to quote other comments when replying in forums.                                                            |
| C      | robotstxt                  | Allows the robots.txt file to be edited.                                                                                  |
| C      | roleassign                 | Allows Scratchpad maintainers to assign roles to new users.                                                               |
| S      | scratchpadify              | Provides some of the adjustments common to all Scratchpads.                                                               |
| C      | search_files               | Enables the contents of attached files to be indexed for search terms.                                                    |
| C      | simplenews                 | Provides the Newsletter issue content type.                                                                               |
| S      | spm                        | Provides a Species Profile Model content type.                                                                            |
| S      | tableorter                 | Enables a table created by the views module to be sorted using Javascript.                                                |
| S      | taxonomy_tree              | Provides a hierarchical checkbox list for selecting taxonomy terms.                                                       |
| S      | taxtab                     | Adjusts the search form so it will autocomplete with vocabulary terms.                                                    |
| C      | thickbox                   | Provides popup boxes that are used by the Citation module.                                                                |

## Scratchpads Additional File - Modules

|   |               |                                                                                           |
|---|---------------|-------------------------------------------------------------------------------------------|
| S | tinymce       | Provides a sidebar block with a vocabulary to facilitate vocabulary and site navigation.  |
| C | token         | Required by the pathauto module.                                                          |
| S | tree          | Provides the Tree (phylogeny) content type.                                               |
| C | vertical_tabs | Cleans up the node edit page to provide a simplified interface to the publishing options. |
| C | views         | A query builder that allows users to create flexible and dynamic views of node content.   |
| S | view_sort     | Allows users to sort content displayed within Taxon pages.                                |
| C | weight        | Used by the view_sort module.                                                             |
| C | wysiwyg       | Enables content to be edited on a site within a WYSIWYG editor.                           |
